# Supplementary material for: Noviembre revive la taquilla con grandes cifras
Source: Royal Society of Chemistry journal article supplement (doi:10.1039/d1dt00128k), 2011-01-01
Supplement: d1dt00128k1.pdf [file d1dt00128k1.pdf]

## **Metal-Organic Frameworks(MOFs) Composite Materials for Photocatalytic CO<sub>2</sub> Reduction under Visible Light**

Zhen Han<sup>a</sup> , Yaomei Fu<sup>b</sup> , Yingchao Zhang<sup>b</sup> , Xiao Zhang<sup>a</sup> , Xing Meng<sup>a</sup> , Ziyang

Zhou<sup>a\*</sup> , Zhongmin Su<sup>b,c</sup>

a. College of Chemistry and Chemical Engineering, Shandong University of Technology, Zibo, Shandong, 255049, China. Email: zyzhou@sdut.edu.cn

b. School of Chemistry and Environmental Engineering, Changchun University of Science and Technology, Changchun, 130022, China.

c. Jilin Provincial Science and Technology Innovation Center of Optical Materials and Chemistry, Changchun, 130022, China.

## Synthesis

### Preparation of 2,4,6-tris (2-(pyridin-4-yl)vinyl)-1,3,5-triazine

Weighing 0.560 g (10 mmol) of KOH and dissolve in 20 mL of methanol, then add 0.749 g (7 mmol) of 4-pyridinecarboxaldehyde in 10 mL of methanol, stir with a magnet and heat to reflux, the solution is very brightly yellow. 0.246 g (2 mmol) trimethyl-s-triazine and 0.680 g KOH dissolved in 25 mL of methanol were added dropwise at a rate of 5 seconds per drop. During the addition, the color of the solution gradually changed from light yellow to dark purple. After the addition, the reaction has continued for 1 h, and then the temperature was lowered to room temperature. The resulting solution was suction filtered, and then washed twice with methanol. After drying, 0.585 g of white powder was obtained with a yield of 75%.  $^1\text{H-NMR}$  (600 MHz, DMSO),  $\delta$  (TMS, ppm): 8.69 (d, 6H,  $J = 5.4$  Hz), 8.29 (d, 3H,  $J = 16.2$  Hz), 7.81 (d, 6H,  $J = 5.4$  Hz), 7.54 (d, 3H,  $J = 16.2$  Hz).

### Preparation of g- $\text{C}_3\text{N}_4$

5 g of melamine was poured into a semi-closed crucible and heated in a muffle furnace at 520 °C for 6 hours with temperature rate of 9 °C/ min. The color of obtained sample was yellow.<sup>1</sup>

### Water absorption test of MOF

We dried MOF at 100°C for 12 h, then transferred to special vacuum flask, and added an appropriate amount of distilled water, pumped to vacuum, the system was stable for 2 h, then transferred MOF material to the synchronous thermal analyzer quickly to test its quality changes.

## Characterization and measurement

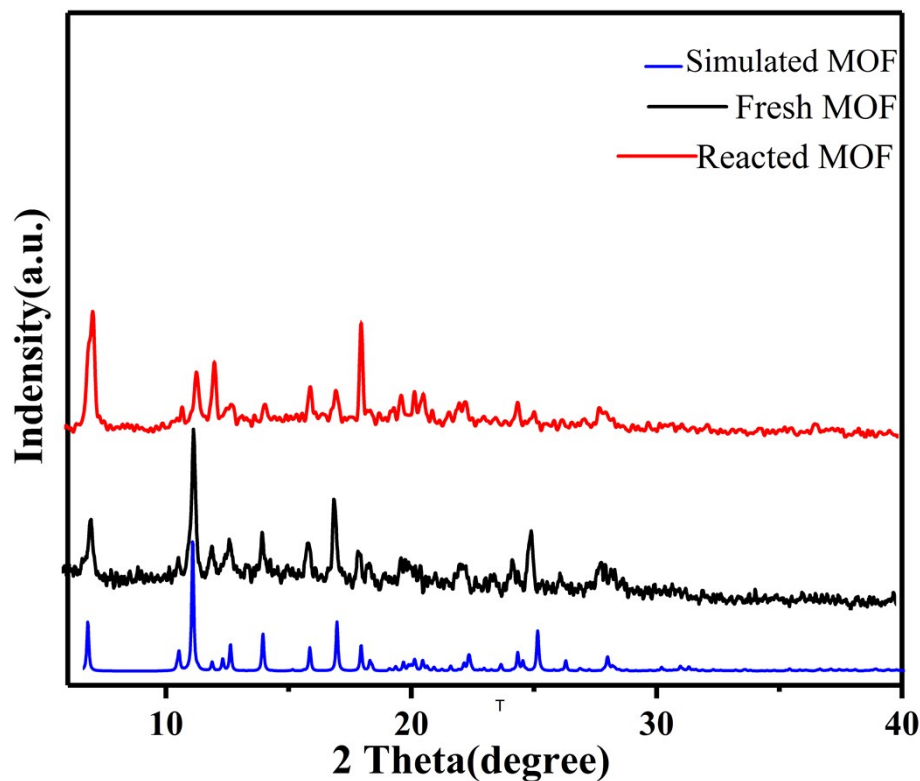

Figure S1 The XRD patterns of simulated MOF, fresh MOF and reacted MOF in composite condition without g- $\text{C}_3\text{N}_4$ .

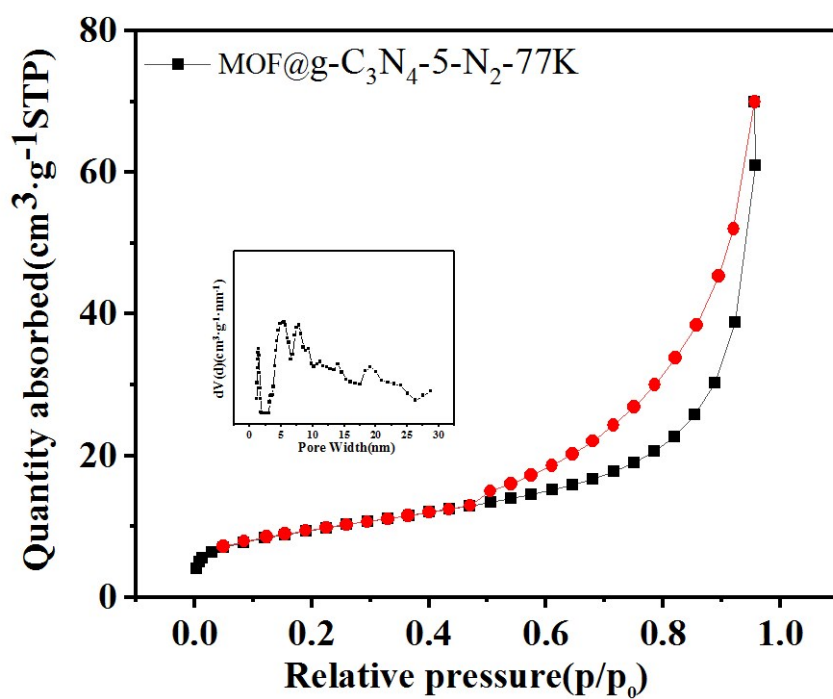

Figure S2 N<sub>2</sub> adsorption and pore size distribution of TPVT-MOFs@g-C<sub>3</sub>N<sub>4</sub>-5.

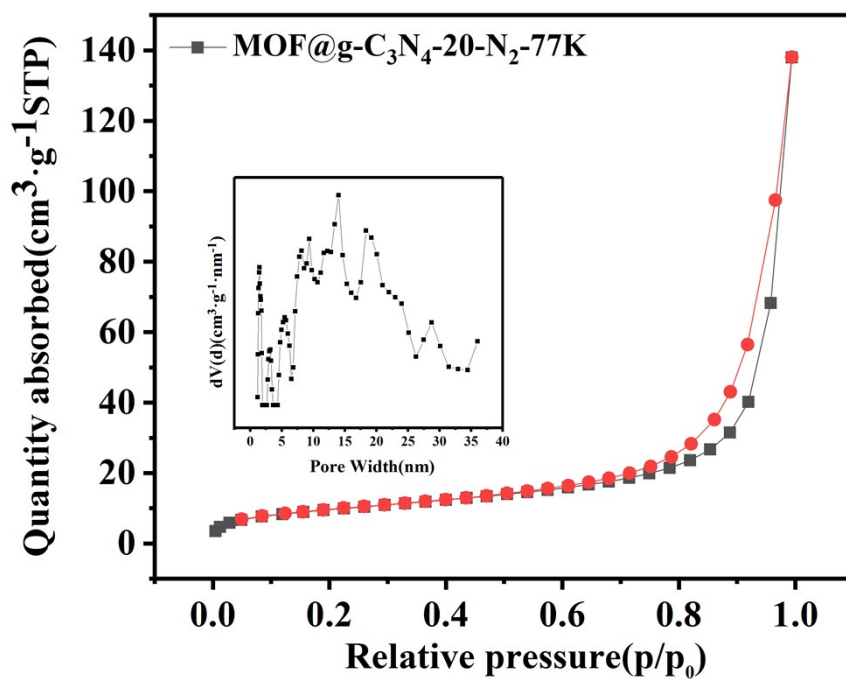

Figure S3 N<sub>2</sub> adsorption and pore size distribution of TPVT-MOFs@g-C<sub>3</sub>N<sub>4</sub>-20.

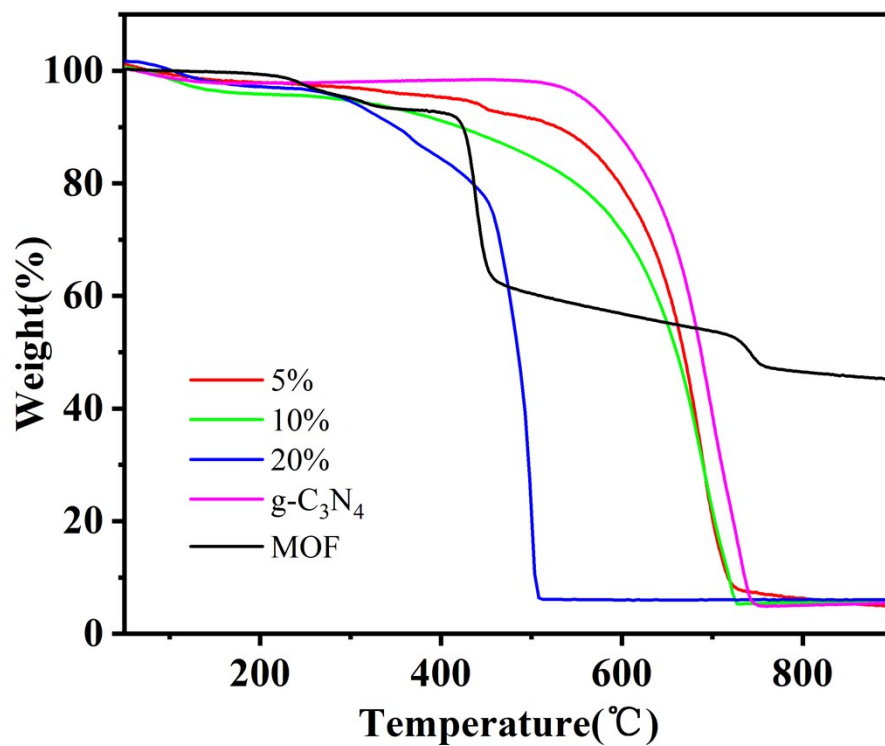

Figure S4 TGA curves of g-C<sub>3</sub>N<sub>4</sub>, TPVT-MOFs and TPVT-MOFs@g-C<sub>3</sub>N<sub>4</sub>.

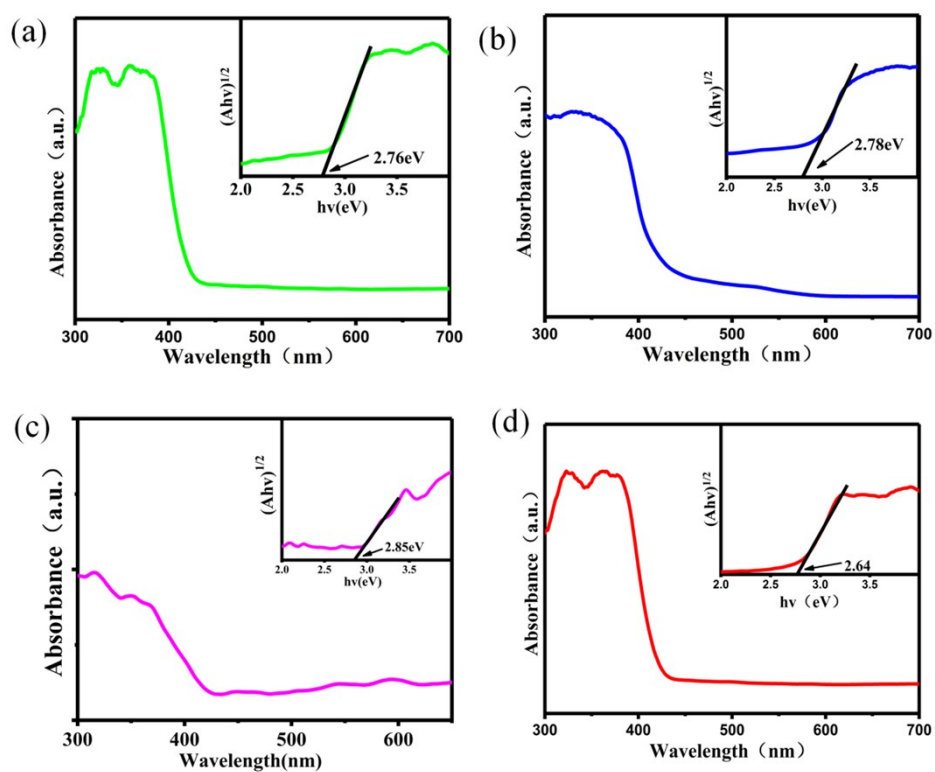

Figure S5 UV-visible spectra of (a)TPVT-MOFs@g-C<sub>3</sub>N<sub>4</sub>-5(b)TPVT-MOFs@g-C<sub>3</sub>N<sub>4</sub>-10(c)TPVT-MOFs@g-C<sub>3</sub>N<sub>4</sub>-20(d)g-C<sub>3</sub>N<sub>4</sub>.

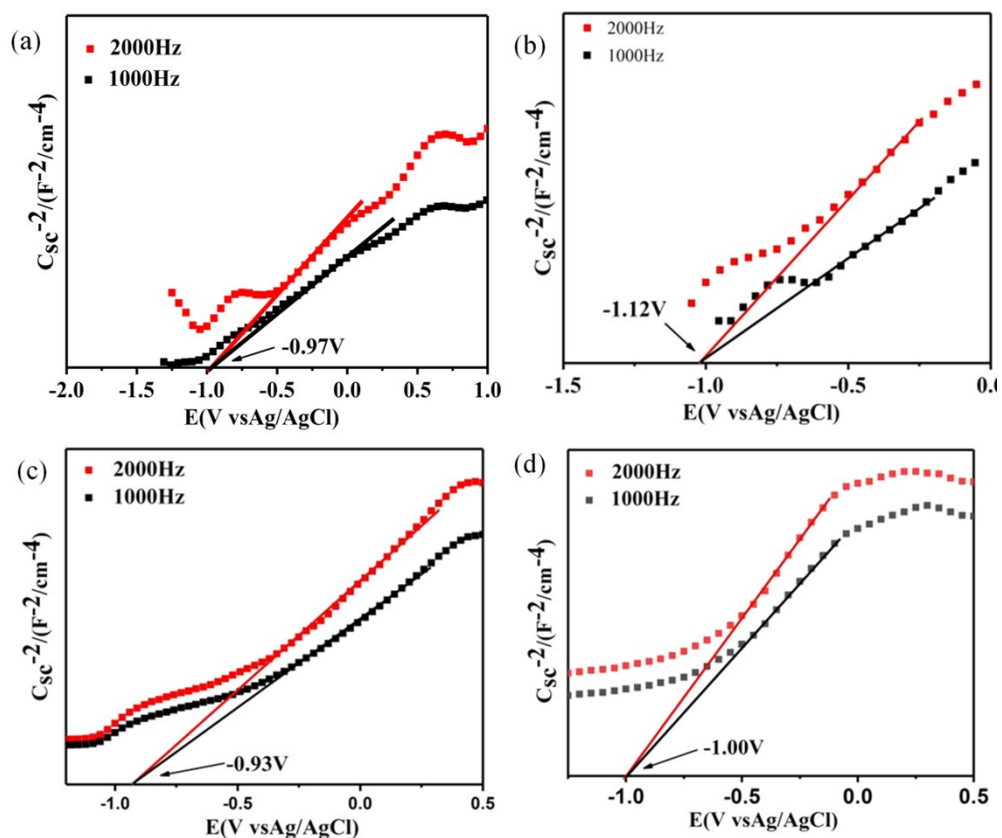

Figure S6 Mott-Schottky measurements of (a)TPVT-MOFs@g-C<sub>3</sub>N<sub>4</sub>-5 (b)TPVT-MOFs@g-C<sub>3</sub>N<sub>4</sub>-10 (c)TPVT-MOFs@g-C<sub>3</sub>N<sub>4</sub>-20 (d)g-C<sub>3</sub>N<sub>4</sub>.

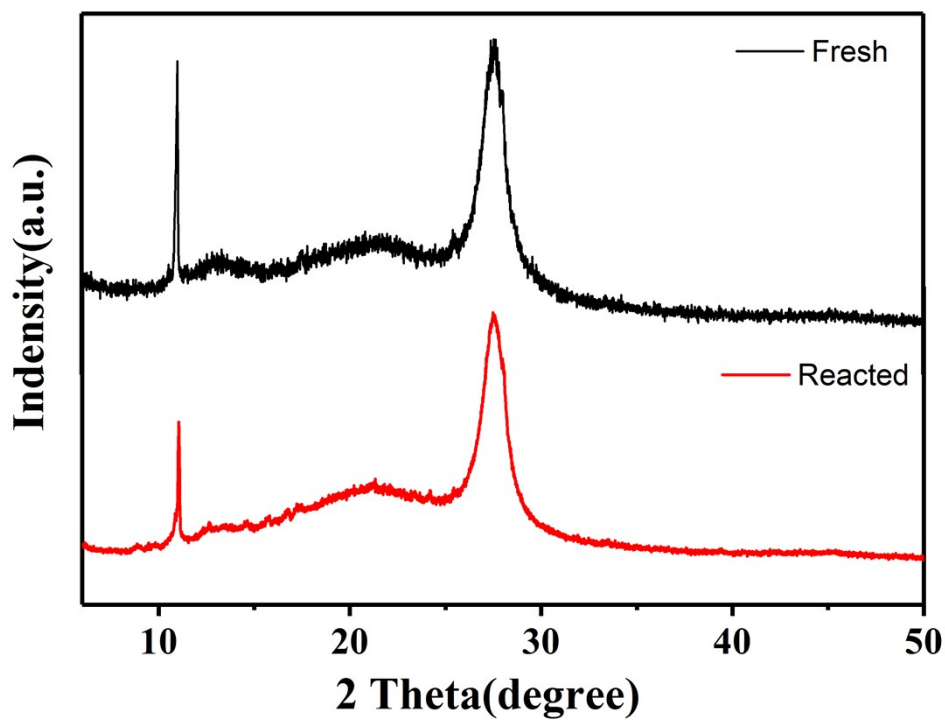

Figure S7 The XRD patterns of (a)fresh and (b)reacted TPVT-MOFs@g-C<sub>3</sub>N<sub>4</sub>-10.

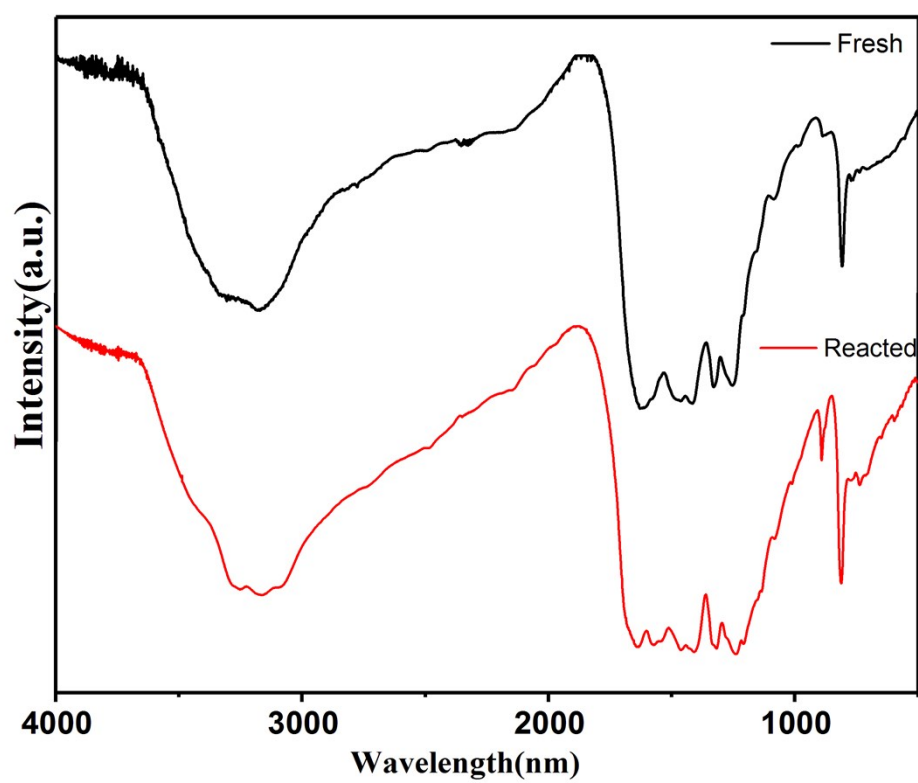

Figure S8 The FT-IR spectra of (a)fresh and (b)reacted TPVT-MOFs@g-C<sub>3</sub>N<sub>4</sub>-10.

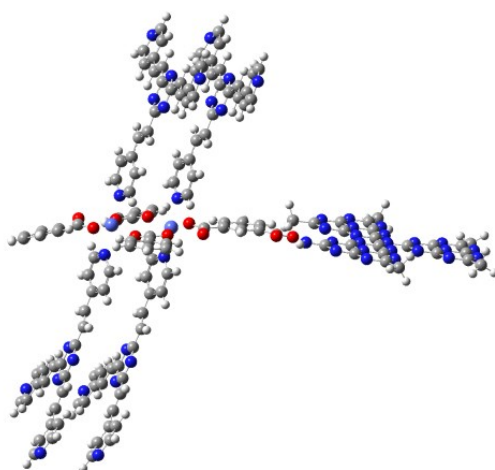

Figure S9 Computational model for TPVT-MOFs@g-C<sub>3</sub>N<sub>4</sub>. Carbon(grey), Nitrogen(blue), Hydrogen(white), Oxygen(red) .

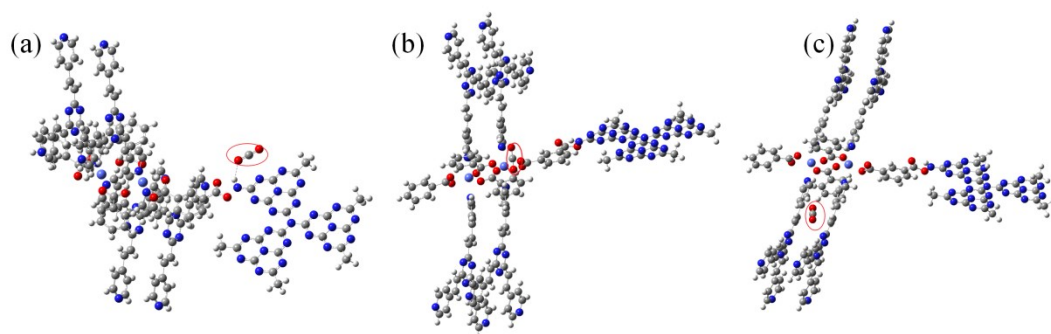

Figure S10 Geometry optimization of CO<sub>2</sub> adsorption energy of TPVT-MOFs@g-C<sub>3</sub>N<sub>4</sub>-10 (a)CO<sub>2</sub>-a (b)CO<sub>2</sub>-b (c)CO<sub>2</sub>-c.

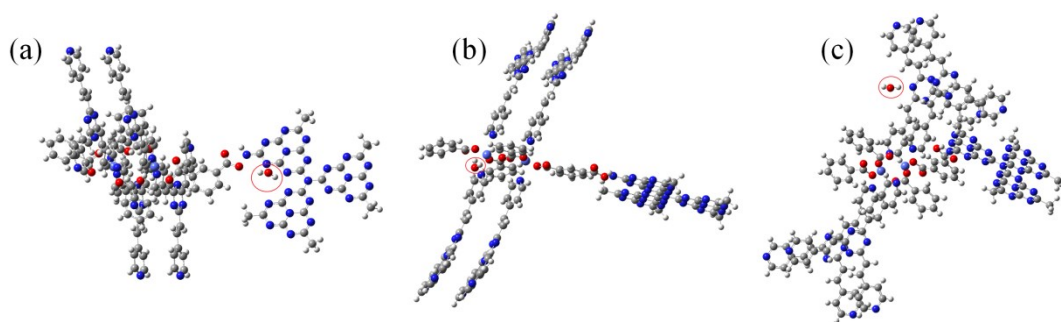

Figure S11 Geometry optimization of H<sub>2</sub>O adsorption energy of TPVT-MOFs@g-C<sub>3</sub>N<sub>4</sub>-10 (a)H<sub>2</sub>O-a (b)H<sub>2</sub>O-b (c)H<sub>2</sub>O-c.

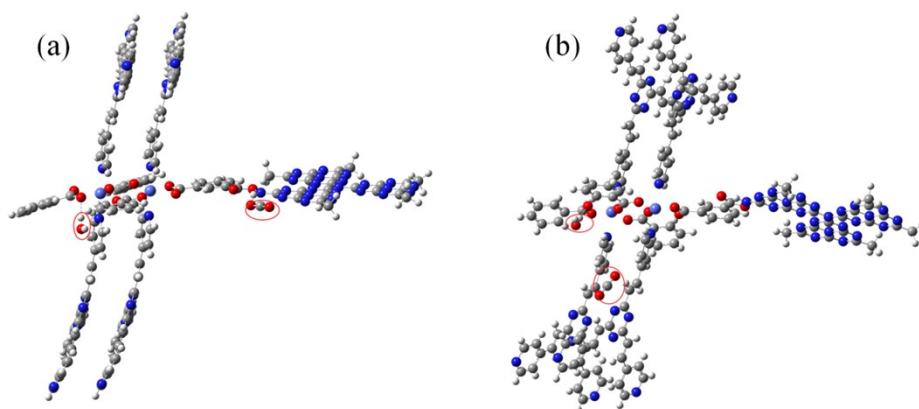

Figure S12 Geometry optimization of H<sub>2</sub>O+CO<sub>2</sub> adsorption energy of TPVT-MOFs@g-C<sub>3</sub>N<sub>4</sub>-10 (a)H<sub>2</sub>O+CO<sub>2</sub>-a (b)H<sub>2</sub>O+CO<sub>2</sub>-b.

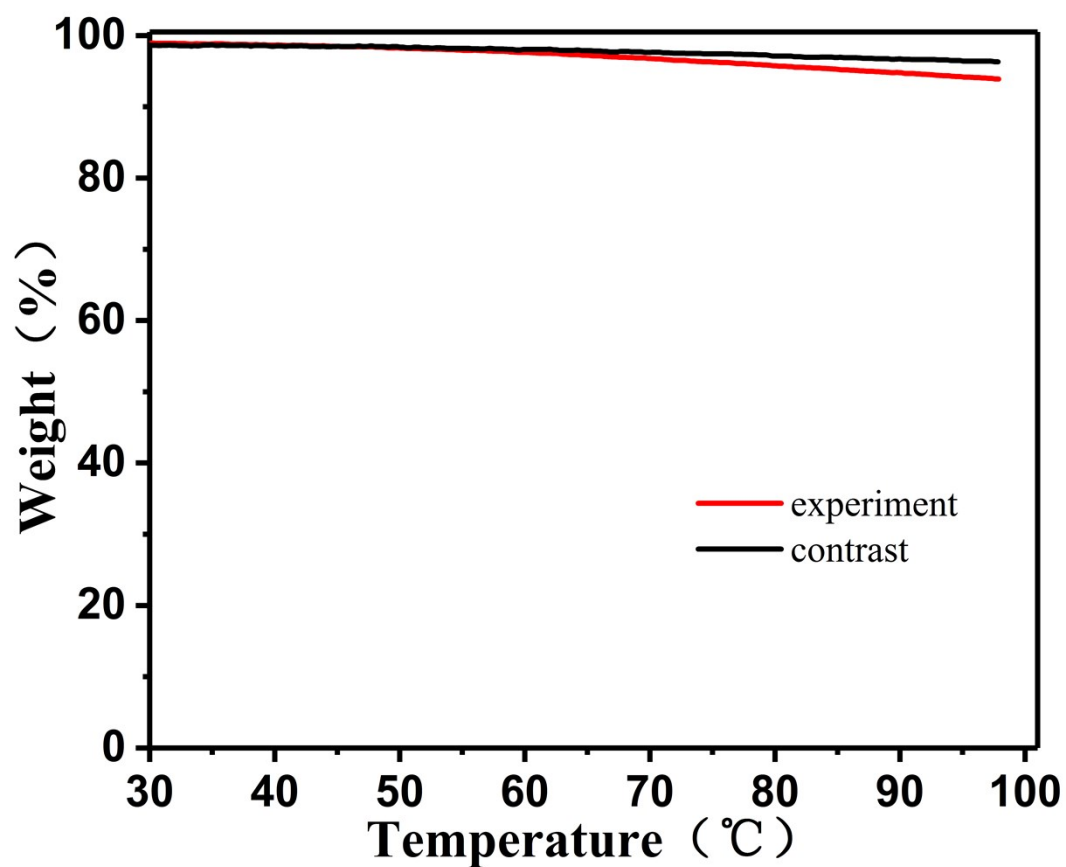

Figure S13 TGA of MOF with H<sub>2</sub>O and pure MOF.

#### Notes and references

- [1] Shekardasht M B , Givianrad M H , Gharbani P , et al. Diamond and Related Materials, 2020, **109**,108008.
